# Supplementary material
Source: publisher figshare collection journal article supplement (https://sage.figshare.com/ndownloader/files/17961557)
Supplement: Supplementary file 1 [file 17961557]

## Web Appendix W1: Representative Research on Innovation and New Products in Global Markets

| Research Article                         | Central Research Issue                                                                                                   | Independent Variables                                                                             | Dependent Variables                              | Moderators / Mediators                                                                               | Context                                                                 | Results                                                                                                                                                                                                                                                                                                        |
|------------------------------------------|--------------------------------------------------------------------------------------------------------------------------|---------------------------------------------------------------------------------------------------|--------------------------------------------------|------------------------------------------------------------------------------------------------------|-------------------------------------------------------------------------|----------------------------------------------------------------------------------------------------------------------------------------------------------------------------------------------------------------------------------------------------------------------------------------------------------------|
| Swan, Kotabe, and Allred (2005)          | Analyzes the influence of robust design capabilities on performance variables given varying levels of uncertainty.       | Robust design capabilities: functional, aesthetic, technological, and quality capabilities        | Market performance and speed to market           | <b>Moderators:</b> Environmental uncertainty                                                         | High-technology firms in the early 2000's                               | Functional capabilities have a positive impact on firm performance and speed-to market in uncertain environments. Technological and aesthetic capabilities have a negative influence on firm performance in uncertain environments.                                                                            |
| Kleinschmidt, De Brentani, Salomo (2007) | The impact of resource commitment and NPD process formality on global knowledge integration and NPD program performance. | Global innovation culture, top management involvement, resource commitment, NPD process formality | Financial performance and windows of opportunity | <b>Mediators:</b> Global knowledge integration, homework activities, launch preparation              | North American and European B2B manufacturing and service firms.        | Resource commitment and process formality are pre-requisites for all NPD process routines. Global innovation culture drives global knowledge integration, which is the most important driver of global NPD program success.                                                                                    |
| Townsend, Yenyurt, and Talay (2009)      | The development of a framework including environmental and firm-level factors as they influence brand globalization.     | Market attractiveness, competition, global experience, brand attractiveness                       | Propensity of a brand to enter a new market      | <b>Moderators:</b> Cultural distance, population distance, per capita distance, growth rate distance | Automotive companies from 26 countries from 1981-2004                   | Cultural distance negatively impacts propensity to enter a new country, but has a weaker impact for more advanced global brands. Foreign competition and the presence of the parent brand has a positive impact on propensity to enter a new country.                                                          |
| Lee, Lin, Wong, and Calantone (2011)     | To provide a better understanding of the patterns of effective product launch in the developed and emerging markets.     | Pricing strategy, advertising strategy, and preannouncement strategy                              | Strategic performance and financial performance  | <b>Moderators:</b> Competition, product innovativeness, and country characteristics.                 | New products launched in the U.S. and in Taiwan in multiple industries. | Customer education preannouncement and promotion discount pricing strategy enhance new product performance and preemption preannouncement strategy upset consumers for both the Taiwan and U.S. market. Findings suggest the distinct patterns of effective product launch for the emerging and mature market. |

| Research Article                                  | Central Research Issue                                                                                                | Independent Variables                                                       | Dependent Variables | Moderators / Mediators                                                                                     | Context                        | Results                                                                                                                                                                                          |
|---------------------------------------------------|-----------------------------------------------------------------------------------------------------------------------|-----------------------------------------------------------------------------|---------------------|------------------------------------------------------------------------------------------------------------|--------------------------------|--------------------------------------------------------------------------------------------------------------------------------------------------------------------------------------------------|
| Evanschitzky, Eisend, Calantone, and Jiang (2012) | To extend the research on factors impacting new product success to include country culture and update prior findings. | Product, strategy, process, marketplace, and organizational characteristics | New product success | <b>Moderators:</b> Management support, services vs. goods, high vs. low-tech, Eastern vs. Western cultures | Meta-analysis from 1999 – 2011 | National culture is an important moderator that weakens effects in individualistic countries and strengthens effects in risk-averse countries. Furthermore, NPD success factors have become more |

|                                              |                                                                                                                                                                         |                                                                            |                                                      |                                                                                                                  |                                                                                                  | widely known, thus dampening their positive effects on new product success over time.                                                                                                                                                                                                                                      |
|----------------------------------------------|-------------------------------------------------------------------------------------------------------------------------------------------------------------------------|----------------------------------------------------------------------------|------------------------------------------------------|------------------------------------------------------------------------------------------------------------------|--------------------------------------------------------------------------------------------------|----------------------------------------------------------------------------------------------------------------------------------------------------------------------------------------------------------------------------------------------------------------------------------------------------------------------------|
| Rubera and Kirca (2012)                      | To develop and test a theoretical framework suggesting that innovativeness indirectly affects firm value through its effects on market position and financial position. | Firm innovativeness                                                        | Market position, financial position, and firm value  | <b>Moderators:</b> Firm size, advertising intensity, industry type, country characteristic                       | Meta-analysis of 159 independent samples in 153 studies                                          | Innovativeness has direct and indirect effects on firm value (through market and financial position). The relationship between innovativeness and firm value is stronger for smaller firms and that invest more in advertising, for firms in low-tech industries, for innovativeness culture, and for radical innovations. |
| Griffith and Rubera (2014)                   | To empirically examine how new product strategies employed for technological and design innovations influence market share across national cultures.                    | Technological innovation, design innovation, and product portfolio breadth | Market share                                         | <b>Moderators:</b> Individualism, uncertainty avoidance, and indulgence.                                         | 26 technological and 12 design innovations across 17 firms operating in eight European countries | The positive effect of design innovation on changes in market share strengthens as individualism and indulgence increase, whereas the positive relationship between technological innovations and market share is weakened as uncertainty avoidance and indulgence increase.                                               |
| Talay, Townsend, and Yeniyurt (2015)         | To develop a framework exploring the relationship between global brand architecture, culture, and market performance                                                    | Global brands, multiregional brands, regional brands                       | Market performance                                   | <b>Moderators:</b> Power distance, individualism, masculinity, uncertainty avoidance                             | Global automotive industry from 2002-2008                                                        | Global automotive brands perform better than non-global auto brands. Global brands performed especially well in countries with higher power distance and higher masculinity.                                                                                                                                               |
| Research Article                             | Central Research Issue                                                                                                                                                  | Independent Variables                                                      | Dependent Variables                                  | Moderators / Mediators                                                                                           | Context                                                                                          | Results                                                                                                                                                                                                                                                                                                                    |
| Katsikeas, Morgan, Leonidou, and Hult (2016) | To systematically examine how marketers should conceptualize and measure the impact of a firm's marketing efforts                                                       | Marketing resources, strategies, actions                                   | Accounting performance, Financial-market performance | <b>Mediators:</b> Customer mindset, customer behavior, product-market performance, customer-level performance    | Meta-analysis of 998 empirical studies published between 1981-2014.                              | The meta-analysis is unable to identify the most important marketing-related driver(s) of performance value. To combat this vagueness, managers should measure a variety of backward- and forward-looking marketing initiatives on varying performance metrics.                                                            |
| Cillo, Griffith, and Rubera (2018)           | To explore and explain the conditions under which product innovativeness impacts stock returns                                                                          | New product portfolio innovativeness,                                      | Stock returns                                        | <b>Moderators:</b> Individualism, uncertainty avoidance, power distance, masculinity, long-term orientation, and | Food and beverage industry across 27 stock exchanges between 2006-2014.                          | Large investors' stock holdings (LISH) mediate the relationship between product portfolio innovativeness. Individualism, power distance, and indulgence positively moderate the                                                                                                                                            |

|                             |                                                                                                                                                 |                                                                              |                           |                                                                                                                |                                               |                                                                                                                                                                                                                                                     |
|-----------------------------|-------------------------------------------------------------------------------------------------------------------------------------------------|------------------------------------------------------------------------------|---------------------------|----------------------------------------------------------------------------------------------------------------|-----------------------------------------------|-----------------------------------------------------------------------------------------------------------------------------------------------------------------------------------------------------------------------------------------------------|
|                             |                                                                                                                                                 |                                                                              |                           | indulgence. Mediators:<br>individual and firm-<br>level large investors'<br>stock holdings                     |                                               | innovativeness-LISH relationship<br>while masculinity negatively<br>moderates this relationship at both<br>the firm-level and the individual-<br>investor level.                                                                                    |
| <b><i>Current study</i></b> | To investigate how product<br>launches in varying<br>countries impact firm<br>financial value while<br>considering varying cultural<br>contexts | New product<br>innovativeness, new<br>product type (hedonic/<br>utilitarian) | Abnormal<br>stock returns | <b>Moderators:</b><br>Individualism vs.<br>collectivism,<br>uncertainty avoidance,<br>indulgence vs. restraint | Consumer<br>packaged goods in<br>58 countries | Highly innovative and hedonistic<br>products positively impact abnormal<br>stock returns. National culture<br>provides complex and multifarious<br>results; in particular, national<br>indulgence score positively<br>moderating these main effects |

---

**Web Appendix W2: Product Categories in the Dataset**

| <b>Product Categories</b> |                            | <b>Product Categories</b> |                        |
|---------------------------|----------------------------|---------------------------|------------------------|
| <b>1</b>                  | Air Care                   | <b>18</b>                 | Hard Surface Care      |
| <b>2</b>                  | Alcoholic Beverages        | <b>19</b>                 | Healthcare             |
| <b>3</b>                  | Baby Food                  | <b>20</b>                 | Home Storage           |
| <b>4</b>                  | Bakery                     | <b>21</b>                 | Hot Beverages          |
| <b>5</b>                  | Breakfast Cereals          | <b>22</b>                 | Juice Drinks           |
| <b>6</b>                  | Carbonated Soft Drinks     | <b>23</b>                 | Oral Hygiene           |
| <b>7</b>                  | Chocolate Confectionery    | <b>24</b>                 | Paper Products         |
| <b>8</b>                  | Color Cosmetics            | <b>25</b>                 | Pest Control           |
| <b>9</b>                  | Dairy                      | <b>26</b>                 | Pet Food               |
| <b>10</b>                 | Deodorants                 | <b>27</b>                 | Pet Products           |
| <b>11</b>                 | Desserts & Ice Cream       | <b>28</b>                 | Sauces & Seasonings    |
| <b>12</b>                 | Diapers & Feminine Hygiene | <b>29</b>                 | Shaving & Depilatories |
| <b>13</b>                 | Dishwashing Products       | <b>30</b>                 | Skincare               |
| <b>14</b>                 | Fabric Care                | <b>31</b>                 | Snacks                 |
| <b>15</b>                 | Fragrances                 | <b>32</b>                 | Soap & Bath Products   |
| <b>16</b>                 | Fruit & Vegetables         | <b>33</b>                 | Sports & Energy Drinks |
| <b>17</b>                 | Hair Products              | <b>34</b>                 | Sweet Spreads          |

**Web Appendix W3: Countries in the Dataset**

| <b>Country</b> |                | <b>Country</b> |                |
|----------------|----------------|----------------|----------------|
| <b>1</b>       | Argentina      | <b>25</b>      | Mexico         |
| <b>2</b>       | Australia      | <b>26</b>      | Netherlands    |
| <b>3</b>       | Austria        | <b>27</b>      | New Zealand    |
| <b>4</b>       | Belgium        | <b>28</b>      | Nigeria        |
| <b>5</b>       | Brazil         | <b>29</b>      | Norway         |
| <b>6</b>       | Canada         | <b>30</b>      | Peru           |
| <b>7</b>       | Chile          | <b>31</b>      | Philippines    |
| <b>8</b>       | China          | <b>32</b>      | Poland         |
| <b>9</b>       | Colombia       | <b>33</b>      | Portugal       |
| <b>10</b>      | Czech Republic | <b>34</b>      | Puerto Rico    |
| <b>11</b>      | Denmark        | <b>35</b>      | Russia         |
| <b>12</b>      | Egypt          | <b>36</b>      | Saudi Arabia   |
| <b>13</b>      | Finland        | <b>37</b>      | Singapore      |
| <b>14</b>      | France         | <b>38</b>      | Slovakia       |
| <b>15</b>      | Germany        | <b>39</b>      | South Africa   |
| <b>16</b>      | Greece         | <b>40</b>      | South Korea    |
| <b>17</b>      | Hong Kong      | <b>41</b>      | Spain          |
| <b>18</b>      | Hungary        | <b>42</b>      | Sri Lanka      |
| <b>19</b>      | India          | <b>43</b>      | Sweden         |
| <b>20</b>      | Indonesia      | <b>44</b>      | Switzerland    |
| <b>21</b>      | Ireland        | <b>45</b>      | Thailand       |
| <b>22</b>      | Italy          | <b>46</b>      | Turkey         |
| <b>23</b>      | Japan          | <b>47</b>      | United Kingdom |
| <b>24</b>      | Malaysia       | <b>48</b>      | Vietnam        |
